# Supplementary material for: Hierarchical dynamics of a transcription factors network in E. coli
Source: Royal Society of Chemistry journal article supplement (doi:10.1039/c2mb25236h), 2012-08-03
Supplement: c2mb25236h.pdf [file c2mb25236h.pdf]

## Supplementary Material 1

Martinez-Antonio et al, MBS-12012

Primers used in this study (5'-3'). These primers correspond to the operator regions (promoters and TF-regulatory sites) from the different genes encoding for TFs used in this work. The PCR products obtained with each these pair of primers were cloned in the upstream region of the *gfpmut2* gene (without promoter) on the corresponding plasmids as described in the Materials and Methods section of the ms.

| <b>Primer name (TF)</b> | <b>Primer sequence (5'-3')</b> |
|-------------------------|--------------------------------|
| p-hns forward           | AGCACTCGAGCTTTCTTCTT           |
| p-hns reverse           | GTCCAGGATCCTATTGCGAC           |
| p-ihfA forward          | AGTTCTTTGGCCTCGAGCTT           |
| p-ihfA reverse          | AACCGGATCCGTCAGCAGAA           |
| p-ihfB forward          | GTAAACAAACTCGAGGATGC           |
| p-ihfB reverse          | ACTGGATCCTCAACCGTCCT           |
| p-fis forward           | CACTGGACCCGCTCGAGGAA           |
| p-fis reverse           | TCTGTAATGGGATCCATGGG           |
| p-ompR forward          | CAGCGCTCGAGGGCGCATGTC          |
| p-ompR reverse          | CCAGGGATCCTTAAGCTCTT           |
| p-hdfR forward          | GACCAAACCTCGAGCGTTCGG          |
| p-hdfR reverse          | AGAATCCACGTGGATCCTGT           |
| p-lrhA forward          | AATGTTCTCGAGAGATCGAG           |
| p-lrhA reverse          | TGCTTCTTTCAGATCTGGAC           |

The transcriptional fusions *qseB::gfp* and *fliA::gfp* were taken from the library created by Saslaver et al. (2006), ref [1] below.

**Supplementary reference:**

1. Zaslaver, A., Bren, A., Ronen, M., Itzkovitz, S., Kikoin, I., Shavit, S., et al. (2006). A comprehensive library of fluorescent transcriptional reporters for *Escherichia coli*. *Nature methods*, **3 (8)**, 623-628.
